# Supplementary material for: In-Depth Analysis of the Mechanism of Astaxanthin Succinate Diester in Reducing Ulcerative Colitis in C57BL/6J Mice Based on Microbiota Informatics
Source: MDPI journal article supplement (doi:10.3390/molecules28186513), 2023-09-08
Supplement: s1 [file s1]

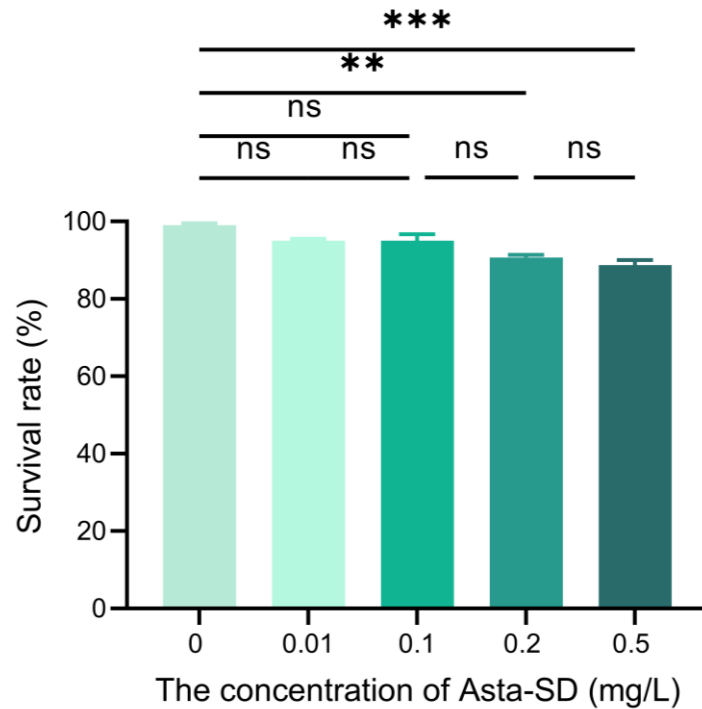

**Figure S1.** The survival rate of zebrafish embryos in different concentrations of Asta-SD at 48 hours. (\*\*  $p < 0.01$  and \*\*\*  $p < 0.001$ ; ANOVA followed by a Bonferroni post hoc test)

**Table S1.** Primer Sequences Used for qRT-PCR Analysis

| Primer        | Forward primer          | Reverse primer        |
|---------------|-------------------------|-----------------------|
| IL-1 $\beta$  | ACTCATTGTGGCTGTGGAGA    | TTGTTTCATCTCGGAGCCTGT |
| IL-6          | CTCTGGCGGAGCTATTGAGA    | AAGTCTCCTGCGTGGAGAAA  |
| TNF- $\alpha$ | CCCTCACACTCAGATCATCTTCT | CTACGACGTGGGCTACAG    |
| IL-10         | CAGAGAAGCATGGCCCAGAA    | GCTCCACTGCCTTGCTCTTA  |
| GAPDH         | TGGAGAAACCTGCCAAGTATGA  | TGGAAGAATGGGAGTTGCTGT |
